# Supplementary material
Source: PubMed Central journal article supplement (PMC6375417)
Supplement: ehp3194.s001.acco.pdf [file ehp3194.s001.acco.pdf]

**Note to readers with disabilities:** *EHP* strives to ensure that all journal content is accessible to all readers. However, some figures and Supplemental Material published in *EHP* articles may not conform to [508 standards](#) due to the complexity of the information being presented. If you need assistance accessing journal content, please contact [ehp508@niehs.nih.gov](mailto:ehp508@niehs.nih.gov). Our staff will work with you to assess and meet your accessibility needs within 3 working days.

### **Supplemental Material**

#### **Pesticide Use and Incident Hypothyroidism in Pesticide Applicators in the Agricultural Health Study**

Srishti Shrestha, Christine G. Parks, Whitney S. Goldner, Freya Kamel, David M. Umbach, Mary H. Ward, Catherine C. Lerro, Stella Koutros, Jonathan N. Hofmann, Laura E. Beane Freeman, and Dale P. Sandler

#### **Table of Contents**

**Figure S1.** Selection of the participants for the study.

**Table S1.** Thyroid disease information collected in the Agricultural Health Study.

**Table S2.** Decision criteria for hyperthyroidism and hypothyroidism (N=1,546).

**Table S3.** Ever-use of pesticide and hypothyroidism risk adjusting for correlated pesticides.

**Table S4.** Intensity-weighted lifetime days of pesticide use and hypothyroidism risk adjusting for correlated pesticides.

**Table S5.** Ever-use of pesticides and hypothyroidism – cases restricted to those taking thyroid-related medications (N=35,073).

**Table S6.** Ever-use of pesticides and hypothyroidism risk excluding female applicators (N=34,375).

**Table S7.** Ever-use of pesticides and hypothyroidism risk – cases restricted to those confirmed by a validation questionnaire or medical records or who reported having hypothyroidism  $\geq 2$  times in surveys (N=34,464).

**Table S8.** Ever-use of pesticide and hypothyroidism risk using inverse probability of censoring weights.

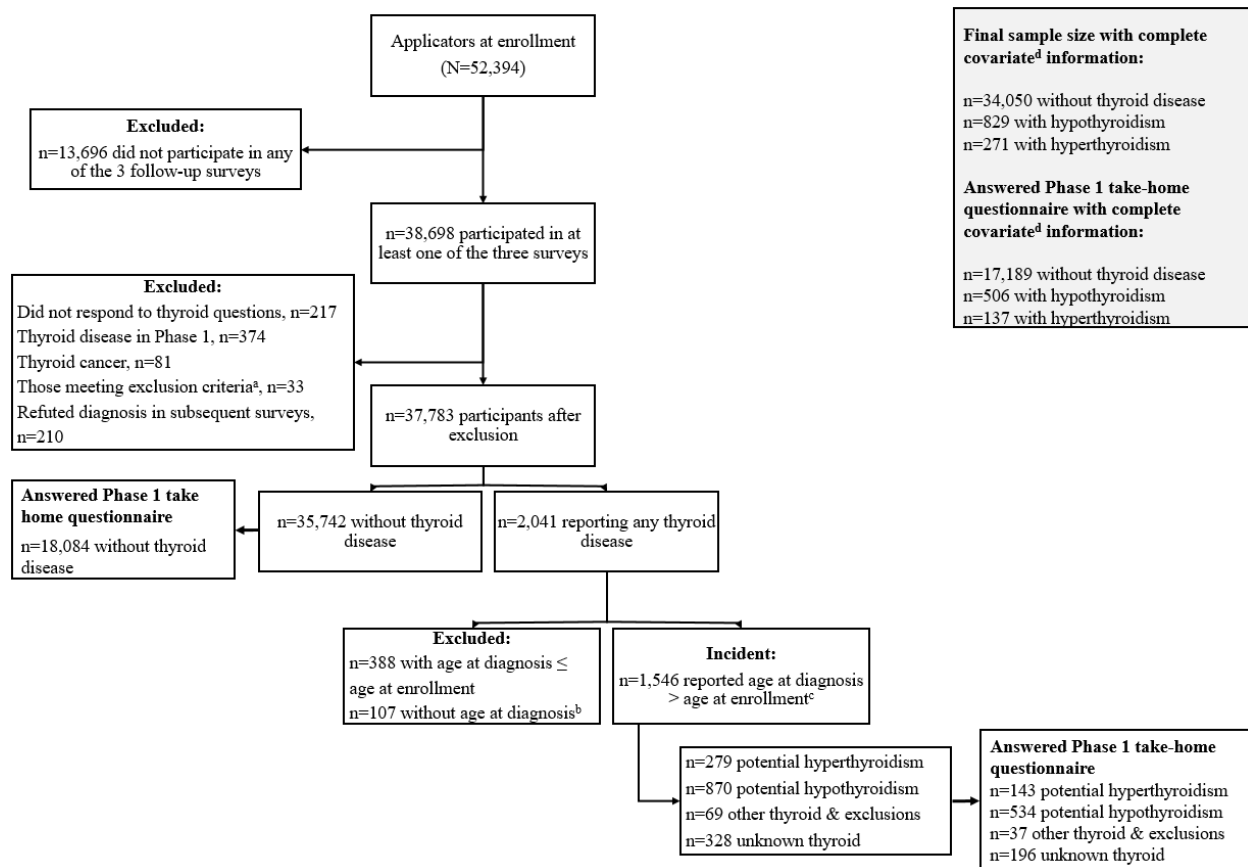

Figure S1: Selection of the participants for the study.

<sup>a</sup>Examples – non-thyroid conditions such as pituitary tumors

<sup>b</sup>With no information on whether thyroid disease was diagnosed before or after enrollment

<sup>c</sup>Age at diagnosis for n=47 thyroid cases was imputed as mid-point between the last report of no disease and when the disease was first reported

<sup>d</sup>Covariates (age, gender, state, education, and smoking) that were included in the model were considered

Table S1: Thyroid disease information collected in the Agricultural Health Study.

---

| Phase 1                                                       |
|---------------------------------------------------------------|
| Has a doctor ever told you that you had been diagnosed with   |
| 1) a. Goiter                                                  |
| b. How old were you when the doctor first told you?           |
| 2) a. Thyrotoxicosis/Grave's disease (excess thyroid hormone) |
| b. How old were you when the doctor first told you?           |
| 3) a. Other thyroid disease.                                  |
| b. How old were you when the doctor first told you?           |

---

| Phase 2                                                                                                                          |
|----------------------------------------------------------------------------------------------------------------------------------|
| Has a doctor or other health professional ever told you that you had thyroid disease or thyroid problem?                         |
| 1) Were you told you had an overactive thyroid (also called hyperthyroidism)?                                                    |
| a. Was it due to Graves' disease?                                                                                                |
| i. How old were you when the doctor first told you that you had this (Graves' disease)?                                          |
| ii. Do you take any medicines for this condition, or did you receive any treatment (like surgery) at the time it was diagnosed?  |
| b. Was it due to thyrotoxicosis?                                                                                                 |
| i. How old were you when the doctor first told you had this (thyrotoxicosis)?                                                    |
| ii. Do you take any medicines for this condition, or did you receive any treatment (like surgery) at the time it was diagnosed?  |
| c. Was there some other cause that was identified?                                                                               |
| i. What was this cause?                                                                                                          |
| ii. How old were you when the doctor first told you had this condition?                                                          |
| iii. Do you take any medicines for this condition, or did you receive any treatment (like surgery) at the time it was diagnosed? |
| 2) Were you told you had an underactive thyroid (also called hypothyroidism)?                                                    |
| a. Was this due to thyroiditis, Hashimoto's disease or autoimmune disease?                                                       |
| i. How old were you when the doctor first told you had this condition?                                                           |
| ii. Do you take any medicines for this condition, or did you receive any treatment (like surgery) at the time it was diagnosed?  |
| b. Was there some other cause that was identified?                                                                               |
| i. What was this cause?                                                                                                          |
| ii. How old were you when the doctor first told you had this condition?                                                          |
| iii. Do you take any medicines for this condition, or did you receive any treatment (like surgery) at the time it was diagnosed? |
| 3) Were you ever told you had an enlarged thyroid, thyroid nodules or Goiter?                                                    |
| a. How old were you when the doctor first told you had this?                                                                     |
| b. Do you take any medicines for this condition, or did you receive any treatment (like surgery) at the time it was diagnosed?   |
| 4) Were you ever told that you had some other thyroid problem?                                                                   |
| a. What was this?                                                                                                                |
| b. How old were you when the doctor first told you had this condition?                                                           |
| c. Do you take any medicines for this condition, or did you receive any treatment (like surgery) at the time it was diagnosed?   |

---

| Phase 3                                                                                                   |
|-----------------------------------------------------------------------------------------------------------|
| Have you ever been diagnosed with thyroid disease or thyroid problems?                                    |
| 1) Have you ever been diagnosed with an overactive thyroid (hyperthyroidism)?                             |
| a. Was this Graves' disease or some other type of thyroid condition that caused overactive thyroid gland? |

---

- 
- i. How old were you when you were first diagnosed with an overactive thyroid condition?
  - ii. Do you currently take any prescribed medicines for this condition?
- 2) Have you ever been diagnosed with an underactive thyroid (hypothyroidism)?
- a. Was this thyroiditis (sometimes called Hashimoto's thyroiditis) or was this some other type of thyroid condition that caused underactive thyroid gland?
    - i. How old were you when participant was first diagnosed with an underactive thyroid condition?
    - ii. Do you currently take any prescribed medicines for this condition?
- 3) If participant do not know about it was over- or under-active thyroid, then they were asked about their age when they were first diagnosed with thyroid disease and if they currently take any prescribed medicines for this condition.
- 

#### Phase 4

---

Have you ever been diagnosed with thyroid disease or thyroid problem?

- 1) Have you ever been diagnosed with overactive thyroid (hyperthyroidism)?
- a. How old were you when you were first diagnosed with an overactive thyroid?
  - b. Was this Graves' disease or some other type of thyroid condition that caused the overactive thyroid gland?
  - c. Do you currently take any prescribed medicines for an overactive thyroid?
- 2) Have you ever been diagnosed with an underactive thyroid (hypothyroidism)?
- a. How old were you when you were first diagnosed with an underactive thyroid?
  - b. Was this thyroiditis, sometimes called Hashimoto's thyroiditis, or some other type or thyroid condition that caused the underactive thyroid gland?
  - c. Do you currently take any prescribed medicines for an underactive thyroid?
-

Table S2: Decision criteria for hyperthyroidism and hypothyroidism (N=1,546).

| General exclusions                                     |                                                                                                                                                                                                                                                                                                | Incident cases |
|--------------------------------------------------------|------------------------------------------------------------------------------------------------------------------------------------------------------------------------------------------------------------------------------------------------------------------------------------------------|----------------|
| 1                                                      | Participants responded 'yes' to 'goiter' or 'other thyroid disease' but did report whether they had hyperthyroidism or hypothyroidism in Phase 2                                                                                                                                               | 30             |
| 2                                                      | Participants responded to thyroid disease question in all three follow-ups but provided inconsistent responses. They reported having thyroid disease in a preceding survey but refuted in subsequent surveys. All but few cases were excluded. Please see bullets 8 and 12 for the exceptions. | 13             |
| 3                                                      | Participants responded 'yes' to thyroid disease question but did not provide information if the disease was hypothyroidism or hyperthyroidism in any follow-up                                                                                                                                 | 328            |
| <b>Hyperthyroidism assigned</b>                        |                                                                                                                                                                                                                                                                                                |                |
| 4                                                      | Participants reported having hyperthyroidism, or both hyperthyroidism and hypothyroidism in the same survey but with age at hyperthyroidism diagnosis $\leq$ age at hypothyroidism diagnosis consistently across the three follow-ups                                                          | 249            |
| 5                                                      | Participants reported having both hyperthyroidism and hypothyroidism but did not report sufficient information to differentiate whether hyperthyroidism or hypothyroidism occurred first                                                                                                       | 1              |
| 6                                                      | Participants reported having hyperthyroidism in two surveys although they reported having hypothyroidism in one survey, irrespective of the response order                                                                                                                                     | 1              |
| 7                                                      | Participants reported having hyperthyroidism in only one of the three follow-ups, and reported hypothyroidism in other subsequent surveys but not preceding surveys                                                                                                                            | 26             |
| 8                                                      | Participants reported hyperthyroidism in two surveys although refuted thyroid disease diagnosis in the third survey, irrespective of the response order                                                                                                                                        | 2              |
| Total                                                  |                                                                                                                                                                                                                                                                                                | 279            |
| <b>Hypothyroidism assigned</b>                         |                                                                                                                                                                                                                                                                                                |                |
| 9                                                      | Participants reported hypothyroidism in any of the three follow-ups but did not report having hyperthyroidism in other phases                                                                                                                                                                  | 856            |
| 10                                                     | Participants reported having hypothyroidism in the two consecutive surveys but followed by report of hyperthyroidism or both thyroid conditions                                                                                                                                                | 4              |
| 11                                                     | Reports of hypothyroidism in any two surveys and both in another with hypothyroidism preceding hyperthyroidism                                                                                                                                                                                 | 1              |
| 12                                                     | Participants reported hypothyroidism in two surveys but refuted hypothyroidism diagnosis (but did not report hyperthyroidism) in the third survey, irrespective of the response order                                                                                                          | 9              |
| Total                                                  |                                                                                                                                                                                                                                                                                                | 870            |
| <b>Other exclusions after 1 through 12 conditions,</b> |                                                                                                                                                                                                                                                                                                |                |
| 13                                                     | Participants reported hypothyroidism in preceding survey and hyperthyroidism in a subsequent survey                                                                                                                                                                                            | 23             |
| 14                                                     | Other inconsistencies (e.g., participants reported hypothyroidism, then hyperthyroidism, and then hypothyroidism)                                                                                                                                                                              | 3              |

Table S3: Ever-use of pesticide and hypothyroidism risk adjusting for correlated pesticides.

| Pesticide                          | HR (95% CI) <sup>a</sup> | p-value | Correlated pesticides <sup>b</sup>          |
|------------------------------------|--------------------------|---------|---------------------------------------------|
| Organochlorine insecticide         |                          |         |                                             |
| Aldrin ≤ 62 years <sup>c</sup>     | 0.96 (0.67, 1.37)        | 0.80    | DDT, Dieldrin, Heptachlor                   |
| > 62 years <sup>c</sup>            | 1.15 (0.87, 1.53)        | 0.33    |                                             |
| Chlordane                          | 1.20 (1.01, 1.42)        | 0.03    | DDT                                         |
| DDT ≤ 62 years <sup>c</sup>        | 0.88 (0.64, 1.20)        | 0.41    | Aldrin, Chlordane                           |
| > 62 years <sup>c</sup>            | 1.03 (0.80, 1.32)        | 0.82    |                                             |
| Heptachlor ≤ 62 years <sup>c</sup> | 0.82 (0.58, 1.16)        | 0.26    | Aldrin, Dieldrin                            |
| > 62 years <sup>c</sup>            | 1.35 (1.04, 1.76)        | 0.02    |                                             |
| Carbamate insecticide              |                          |         |                                             |
| Aldicarb                           | 0.75 (0.55, 1.02)        | 0.07    | Benomyl, Chlorothalonil<br>Diazinon         |
| Carbaryl                           | 1.05 (0.89, 1.24)        | 0.55    |                                             |
| Organophosphate insecticide        |                          |         |                                             |
| Diazinon                           | 1.26 (1.07, 1.47)        | 0.01    | Carbaryl                                    |
| Fungicide                          |                          |         |                                             |
| Benomyl                            | 1.03 (0.75, 1.42)        | 0.85    | Aldicarb, Chlorothalonil,<br>Maneb/Mancozeb |
| Chlorothalonil                     | 0.98 (0.70, 1.39)        | 0.92    |                                             |
| Maneb/Mancozeb                     | 0.95 (0.71, 1.28)        | 0.75    | Benomyl                                     |
| Metalaxyl                          | 0.91 (0.74, 1.13)        | 0.40    | Methyl Bromide                              |
| Fumigant                           |                          |         |                                             |
| Methyl Bromide                     | 0.93 (0.72, 1.22)        | 0.61    | Metalaxyl                                   |
| Herbicide                          |                          |         |                                             |
| Butylate                           | 1.08 (0.92, 1.28)        | 0.34    | Metribuzin                                  |
| Dicamba                            | 1.31 (1.10, 1.56)        | <0.01   | Imazethapyr                                 |
| Imazethapyr                        | 0.96 (0.81, 1.13)        | 0.59    | Dicamba                                     |
| Trifluralin                        | 1.13 (0.96, 1.34)        | 0.15    | Metribuzin                                  |
| 2,4,5-T                            | 1.02 (0.84, 1.23)        | 0.88    | 2,4,5-TP                                    |
| Metribuzin                         | 0.95 (0.79, 1.13)        | 0.53    | Butylate, Trifluralin                       |

Abbreviation: 2,4,5-T, 2,4,5-Trichlorophenoxyacetic acid; 2,4,5-T,P, 2-(2,4,5-trichlorophenoxy) propionic acid; CI, Confidence Intervals; DDT, Dichlorodiphenyltrichloroethane; HR, Hazard Ratio

<sup>a</sup>Adjusted for sex, education, state, smoking, and correlated pesticides

<sup>b</sup>Pesticides correlated with Phi coefficient  $\geq 0.40$

<sup>c</sup>HR allowed to vary by the median age for pesticides for which proportional hazards assumptions were not met

Table S4: Intensity-weighted lifetime days of pesticide use and hypothyroidism risk adjusting for correlated pesticides

| Pesticide      | Intensity-weighted days <sup>a</sup> | HR (95% CI) <sup>b</sup> | p-value | p-trend <sup>c</sup> | Correlated pesticides                          |
|----------------|--------------------------------------|--------------------------|---------|----------------------|------------------------------------------------|
| Chlordane      | > 0 – ≤238                           | 1.35 (0.97, 1.88)        | 0.08    | 0.01                 | DDT                                            |
|                | > 238 – ≤720                         | 1.61 (1.19, 2.18)        | 0.00    |                      |                                                |
|                | > 720                                | 1.50 (1.08, 2.08)        | 0.02    |                      |                                                |
| DDT            | > 0 – ≤335                           | 1.00 (0.72, 1.41)        | 0.98    | 0.53                 | Aldrin, Chlordane                              |
|                | > 335 – ≤1599                        | 1.04 (0.75, 1.45)        | 0.80    |                      |                                                |
|                | > 1599                               | 1.11 (0.79, 1.56)        | 0.54    |                      |                                                |
| Heptachlor     | > 0 – ≤289                           | 0.89 (0.58, 1.38)        | 0.62    | 0.99                 | Aldrin, Dieldrin                               |
|                | > 289 – ≤882                         | 0.96 (0.63, 1.47)        | 0.86    |                      |                                                |
|                | > 882                                | 0.99 (0.65, 1.53)        | 0.98    |                      |                                                |
| Carbaryl       | > 0 – ≤380                           | 1.24 (0.96, 1.60)        | 0.10    | 0.89                 | Diazinon                                       |
|                | > 380 – ≤2337                        | 1.23 (0.94, 1.62)        | 0.13    |                      |                                                |
|                | > 2337                               | 1.12 (0.80, 1.55)        | 0.51    |                      |                                                |
| Diazinon       | > 0 – ≤315                           | 1.30 (0.95, 1.78)        | 0.10    | 0.03                 | Carbaryl                                       |
|                | > 315 – ≤1218                        | 1.39 (1.02, 1.89)        | 0.04    |                      |                                                |
|                | > 1218                               | 1.44 (1.03, 2.01)        | 0.03    |                      |                                                |
| Methyl Bromide | > 0 – ≤320                           | 1.06 (0.74, 1.52)        | 0.73    | 0.46                 | Metalaxyl                                      |
|                | > 320 – ≤1372                        | 0.94 (0.64, 1.40)        | 0.78    |                      |                                                |
|                | > 1372                               | 0.87 (0.58, 1.31)        | 0.50    |                      |                                                |
| Benomyl        | > 0 – ≤841                           | 1.27 (0.78, 2.08)        | 0.34    | 0.65                 | Aldicarb,<br>Chlorothalonil,<br>Maneb/Mancozeb |
|                | > 841                                | 0.91 (0.49, 1.67)        | 0.76    |                      |                                                |
| Chlorothalonil | > 0 – ≤588                           | 1.12 (0.69, 1.82)        | 0.65    | 0.39                 | Aldicarb, Benomyl                              |
|                | > 588 – ≤3162                        | 1.28 (0.77, 2.13)        | 0.34    |                      |                                                |
|                | > 3162                               | 0.73 (0.37, 1.44)        | 0.37    |                      |                                                |
| Maneb/Mancozeb | > 0 – ≤457                           | 0.50 (0.22, 1.13)        | 0.10    | 0.84                 | Benomyl                                        |
|                | > 457 – ≤2744                        | 1.35 (0.78, 2.34)        | 0.28    |                      |                                                |
|                | > 2744                               | 0.99 (0.53, 1.88)        | 0.99    |                      |                                                |
| Metalaxyl      | > 0 – ≤312                           | 0.70 (0.45, 1.07)        | 0.10    | 0.54                 | Methyl Bromide                                 |
|                | > 312 – ≤1512                        | 0.90 (0.58, 1.41)        | 0.66    |                      |                                                |
|                | > 1512                               | 1.11 (0.69, 1.77)        | 0.68    |                      |                                                |
| Butylate       | > 0 – ≤455                           | 1.10 (0.81, 1.50)        | 0.53    | 0.39                 | Metribuzin                                     |
|                | > 455 – ≤1523                        | 0.94 (0.68, 1.31)        | 0.71    |                      |                                                |
|                | > 1523                               | 1.17 (0.86, 1.59)        | 0.32    |                      |                                                |
| Dicamba        | > 0 – ≤572                           | 1.27 (1.02, 1.58)        | 0.03    | 0.10                 | Imazethapyr                                    |
|                | > 572 – ≤2184                        | 1.35 (1.09, 1.68)        | 0.01    |                      |                                                |
|                | > 2184                               | 1.32 (1.06, 1.65)        | 0.01    |                      |                                                |
| Imazethapyr    | > 0 – ≤341                           | 0.93 (0.74, 1.16)        | 0.52    | 0.81                 | Dicamba                                        |
|                | > 341 – ≤1015                        | 0.99 (0.79, 1.24)        | 0.92    |                      |                                                |

| Pesticide                       | Intensity-weighted days <sup>a</sup> | HR (95% CI) <sup>b</sup> | p-value           | p-trend <sup>c</sup> | Correlated pesticides |      |      |
|---------------------------------|--------------------------------------|--------------------------|-------------------|----------------------|-----------------------|------|------|
| Trifluralin                     | > 1015                               | 0.96 (0.76, 1.21)        | 0.70              | 0.74                 | Metribuzin            |      |      |
|                                 | > 0 – ≤1008                          | 1.02 (0.78, 1.34)        | 0.87              |                      |                       |      |      |
|                                 | > 1008 – ≤3828                       | 1.16 (0.89, 1.51)        | 0.28              |                      |                       |      |      |
|                                 | > 3828                               | 0.97 (0.73, 1.29)        | 0.84              |                      |                       |      |      |
| 2,4,5-T <sup>d</sup> ≤ 62 years | > 0 – ≤480                           | 0.86 (0.53, 1.39)        | 0.53              | 0.17                 | 2,4,5-TP              |      |      |
|                                 | > 480                                | 0.70 (0.39, 1.26)        | 0.24              |                      |                       |      |      |
|                                 | > 62 years                           | > 0 – ≤480               | 1.43 (1.01, 2.02) |                      |                       | 0.05 | 0.11 |
|                                 | > 480                                | 1.42 (1.00, 2.01)        | 0.05              |                      |                       |      |      |
| Metribuzin                      | > 0 – ≤315                           | 1.04 (0.77, 1.39)        | 0.82              | 0.40                 | Butylate, Trifluralin |      |      |
|                                 | > 315 – ≤1006                        | 0.88 (0.64, 1.20)        | 0.42              |                      |                       |      |      |
|                                 | > 1006                               | 1.13 (0.84, 1.52)        | 0.40              |                      |                       |      |      |

Abbreviation: 2,4,5-T, 2,4,5-Trichlorophenoxyacetic acid; CI, Confidence Intervals; DDT, Dichlorodiphenyltrichloroethane; HR, Hazard Ratio

<sup>a</sup> Split using tertile cut-offs or at the median of intensity-weighted lifetime days among exposed for each pesticide

<sup>b</sup> Adjusted for sex, education, state, and smoking

<sup>c</sup> P-trend values were obtained using an ordinal variable coded with median values for each category

<sup>d</sup> Hazard ratio allowed to vary by the median age (i.e., 62 years) for pesticides for which proportional hazards assumptions were not met ( $p \leq 0.10$ )



Table S5: Ever-use of pesticides and hypothyroidism – cases restricted to those taking thyroid-related medications (N=35,073).

| Pesticide                                         | Exposed cases | HR (95% CI) <sup>a</sup> | P-value |
|---------------------------------------------------|---------------|--------------------------|---------|
| <b>Organochlorine insecticide</b>                 |               |                          |         |
| Aldrin ≤ 62 years <sup>b</sup>                    | 50            | 0.85 (0.62, 1.15)        | 0.29    |
| > 62 years <sup>b</sup>                           | 144           | 1.28 (1.01, 1.62)        | 0.04    |
| Chlordane                                         | 254           | 1.22 (1.04, 1.43)        | 0.02    |
| DDT ≤ 62 years <sup>b</sup>                       | 58            | 0.88 (0.66, 1.18)        | 0.39    |
| > 62 years <sup>b</sup>                           | 191           | 1.22 (0.98, 1.53)        | 0.08    |
| Dieldrin ≤ 62 years <sup>b</sup>                  | 17            | 0.94 (0.58, 1.54)        | 0.82    |
| > 62 years <sup>b</sup>                           | 62            | 1.21 (0.91, 1.61)        | 0.19    |
| Heptachlor ≤ 62 years <sup>b</sup>                | 42            | 0.86 (0.62, 1.20)        | 0.37    |
| > 62 years <sup>b</sup>                           | 131           | 1.42 (1.11, 1.80)        | <0.01   |
| Lindane ≤ 62 years <sup>b</sup>                   | 84            | 1.04 (0.81, 1.33)        | 0.77    |
| > 62 years <sup>b</sup>                           | 110           | 1.58 (1.25, 2.00)        | <0.01   |
| Toxaphene ≤ 62 years <sup>b</sup>                 | 39            | 0.77 (0.55, 1.08)        | 0.13    |
| > 62 years <sup>b</sup>                           | 77            | 1.13 (0.87, 1.46)        | 0.37    |
| <b>Carbamate insecticide</b>                      |               |                          |         |
| Aldicarb                                          | 56            | 0.80 (0.59, 1.07)        | 0.13    |
| Carbaryl                                          | 452           | 1.11 (0.95, 1.30)        | 0.21    |
| Carbofuran                                        | 240           | 1.16 (0.99, 1.37)        | 0.06    |
| <b>Organophosphate insecticide</b>                |               |                          |         |
| Chlorpyrifos                                      | 322           | 1.04 (0.90, 1.20)        | 0.6     |
| Coumaphos ≤ 62 years <sup>b</sup>                 | 32            | 0.86 (0.60, 1.24)        | 0.42    |
| > 62 years <sup>b</sup>                           | 44            | 1.42 (1.03, 1.95)        | 0.03    |
| Diazinon                                          | 287           | 1.32 (1.13, 1.54)        | <0.01   |
| Dichlorvos                                        | 122           | 1.45 (1.18, 1.77)        | <0.01   |
| Fonofos                                           | 191           | 1.17 (0.99, 1.40)        | 0.07    |
| Malathion                                         | 567           | 1.19 (1.00, 1.42)        | 0.05    |
| Parathion                                         | 130           | 1.20 (0.98, 1.46)        | 0.08    |
| Phorate                                           | 262           | 1.01 (0.86, 1.19)        | 0.91    |
| Terbufos                                          | 313           | 1.17 (1.01, 1.37)        | 0.04    |
| <b>Pyrethroid insecticide</b>                     |               |                          |         |
| Permethrin (animals)                              | 115           | 1.19 (0.97, 1.46)        | 0.10    |
| Permethrin (crops)                                | 110           | 1.27 (1.03, 1.56)        | 0.03    |
| <b>Fumigant</b>                                   |               |                          |         |
| Carbon tetrachloride/ Carbon disulphide 80/20 mix | 57            | 1.09 (0.83, 1.44)        | 0.53    |
| Aluminum Phosphide ≤62 years <sup>b</sup>         | 21            | 0.97 (0.62, 1.50)        | 0.88    |
| > 62 years <sup>b</sup>                           | 16            | 1.23 (0.74, 2.03)        | 0.42    |
| Ethylene Dibromide                                | 22            | 0.84 (0.55, 1.29)        | 0.43    |
| Methyl Bromide                                    | 102           | 0.98 (0.76, 1.25)        | 0.86    |
| <b>Fungicide</b>                                  |               |                          |         |
| Benomyl                                           | 68            | 0.94 (0.71, 1.23)        | 0.64    |
| Captan                                            | 76            | 0.87 (0.69, 1.11)        | 0.27    |
| Chlorothalonil                                    | 45            | 0.88 (0.64, 1.21)        | 0.43    |
| Maneb/Mancozeb                                    | 67            | 0.95 (0.72, 1.25)        | 0.69    |
| Metalaxyl                                         | 143           | 0.92 (0.75, 1.13)        | 0.44    |

| Pesticide                             | Exposed cases | HR (95% CI) <sup>a</sup> | P-value |
|---------------------------------------|---------------|--------------------------|---------|
| Herbicide                             |               |                          |         |
| Alachlor                              | 410           | 1.07 (0.92, 1.25)        | 0.39    |
| Butylate                              | 257           | 1.08 (0.92, 1.27)        | 0.34    |
| Chlorimuron Ethyl                     | 241           | 0.93 (0.80, 1.09)        | 0.39    |
| Dicamba                               | 424           | 1.36 (1.14, 1.62)        | <0.01   |
| EPTC                                  | 156           | 1.08 (0.90, 1.29)        | 0.43    |
| Glyphosate                            | 601           | 1.28 (1.06, 1.54)        | 0.01    |
| Imazethapyr                           | 313           | 0.99 (0.84, 1.18)        | 0.94    |
| Metolachlor                           | 340           | 1.02 (0.88, 1.19)        | 0.78    |
| Paraquat                              | 157           | 0.95 (0.79, 1.15)        | 0.6     |
| Pendimethalin                         | 285           | 0.91 (0.78, 1.06)        | 0.21    |
| Petroleum Oil ≤ 62 years <sup>b</sup> | 189           | 0.93 (0.76, 1.14)        | 0.48    |
| > 62 years <sup>b</sup>               | 167           | 1.18 (0.94, 1.49)        | 0.15    |
| Trifluralin                           | 410           | 1.10 (0.94, 1.30)        | 0.23    |
| 2,4-D                                 | 617           | 1.37 (1.12, 1.69)        | <0.01   |
| 2,4,5-T                               | 207           | 1.12 (0.95, 1.33)        | 0.19    |
| 2,4,5-TP                              | 89            | 1.17 (0.93, 1.47)        | 0.17    |
| Atrazine ≤ 62 years <sup>b</sup>      | 294           | 0.97 (0.77, 1.23)        | 0.80    |
| > 62 years <sup>b</sup>               | 258           | 1.11 (0.86, 1.45)        | 0.41    |
| Cyanazine                             | 327           | 1.06 (0.90, 1.25)        | 0.47    |
| Metribuzin                            | 348           | 1.03 (0.88, 1.21)        | 0.74    |

Abbreviation: 2,4-D, 2,4-Dichlorophenoxyacetic acid; 2,4,5-T, 2,4,5-Trichlorophenoxyacetic acid; 2,4,5-T,P, 2-(2,4,5-trichlorophenoxy) propionic acid; CI, Confidence Intervals; DDT,

Dichlorodiphenyltrichloroethane; EPTC, S-Ethyl dipropylthiocarbamate; HR, Hazard Ratio

<sup>a</sup>Adjusted for sex, education, state, and smoking

<sup>b</sup>HR allowed to vary by the median age for pesticides that did not meet proportional hazards assumptions

Table S6: Ever-use of pesticides and hypothyroidism risk excluding female applicators (N=34,375).

| Pesticide                                         | Exposed cases | HR (95% CI) <sup>a</sup> | P-value |
|---------------------------------------------------|---------------|--------------------------|---------|
| <b>Organochlorine insecticide</b>                 |               |                          |         |
| Aldrin ≤ 62 years <sup>b</sup>                    | 57            | 0.88 (0.66, 1.18)        | 0.39    |
| > 62 years <sup>b</sup>                           | 167           | 1.26 (1.00, 1.58)        | 0.05    |
| Chlordane                                         | 274           | 1.22 (1.05, 1.43)        | 0.01    |
| DDT ≤ 62 years <sup>b</sup>                       | 61            | 0.83 (0.63, 1.11)        | 0.22    |
| > 62 years <sup>b</sup>                           | 209           | 1.19 (0.95, 1.49)        | 0.12    |
| Dieldrin ≤ 62 years <sup>b</sup>                  | 18            | 0.91 (0.56, 1.46)        | 0.68    |
| > 62 years <sup>b</sup>                           | 72            | 1.21 (0.92, 1.59)        | 0.17    |
| Heptachlor ≤ 62 years <sup>b</sup>                | 44            | 0.81 (0.59, 1.12)        | 0.21    |
| > 62 years <sup>b</sup>                           | 145           | 1.37 (1.09, 1.74)        | 0.01    |
| Lindane ≤ 62 years <sup>b</sup>                   | 90            | 1.06 (0.83, 1.34)        | 0.66    |
| > 62 years <sup>b</sup>                           | 125           | 1.58 (1.26, 1.99)        | <0.01   |
| Toxaphene ≤ 62 years <sup>b</sup>                 | 44            | 0.79 (0.58, 1.09)        | 0.15    |
| > 62 years <sup>b</sup>                           | 88            | 1.13 (0.88, 1.45)        | 0.35    |
| <b>Carbamate insecticide</b>                      |               |                          |         |
| Aldicarb                                          | 57            | 0.74 (0.56, 0.99)        | 0.05    |
| Carbaryl                                          | 473           | 1.15 (0.98, 1.35)        | 0.08    |
| Carbofuran                                        | 253           | 1.13 (0.97, 1.32)        | 0.11    |
| <b>Organophosphate insecticide</b>                |               |                          |         |
| Chlorpyrifos                                      | 339           | 1.02 (0.88, 1.18)        | 0.79    |
| Coumaphos ≤ 62 years <sup>b</sup>                 | 36            | 0.93 (0.66, 1.31)        | 0.66    |
| > 62 years <sup>b</sup>                           | 53            | 1.48 (1.09, 2.01)        | 0.01    |
| Diazinon                                          | 294           | 1.30 (1.12, 1.52)        | <0.01   |
| Dichlorvos                                        | 127           | 1.41 (1.16, 1.72)        | <0.01   |
| Fonofos                                           | 201           | 1.15 (0.97, 1.37)        | 0.10    |
| Malathion                                         | 600           | 1.25 (1.05, 1.49)        | 0.01    |
| Parathion                                         | 139           | 1.18 (0.97, 1.43)        | 0.10    |
| Phorate                                           | 286           | 1.04 (0.89, 1.21)        | 0.64    |
| Terbufos                                          | 328           | 1.13 (0.97, 1.32)        | 0.11    |
| <b>Pyrethroid insecticide</b>                     |               |                          |         |
| Permethrin (animals)                              | 122           | 1.21 (0.99, 1.48)        | 0.06    |
| Permethrin (crops)                                | 109           | 1.18 (0.96, 1.45)        | 0.11    |
| <b>Fumigant</b>                                   |               |                          |         |
| Carbon tetrachloride/ Carbon disulphide 80/20 mix | 57            | 1.02 (0.77, 1.34)        | 0.91    |
| Aluminum Phosphide ≤ 62 years <sup>b</sup>        | 22            | 0.94 (0.61, 1.44)        | 0.77    |
| > 62 years <sup>b</sup>                           | 21            | 1.27 (0.79, 2.04)        | 0.33    |
| Ethylene Dibromide                                | 22            | 0.77 (0.5, 1.18)         | 0.23    |
| Methyl Bromide                                    | 106           | 0.94 (0.73, 1.20)        | 0.60    |
| <b>Fungicide</b>                                  |               |                          |         |
| Benomyl                                           | 68            | 0.90 (0.69, 1.18)        | 0.46    |
| Captan                                            | 81            | 0.90 (0.71, 1.14)        | 0.38    |
| Chlorothalonil                                    | 48            | 0.90 (0.66, 1.23)        | 0.50    |
| Maneb/Mancozeb                                    | 67            | 0.90 (0.68, 1.19)        | 0.46    |
| Metalaxyl                                         | 145           | 0.88 (0.71, 1.07)        | 0.20    |
| <b>Herbicide</b>                                  |               |                          |         |
| Alachlor                                          | 438           | 1.06 (0.91, 1.23)        | 0.45    |

| Pesticide                             | Exposed cases | HR (95% CI) <sup>a</sup> | P-value |
|---------------------------------------|---------------|--------------------------|---------|
| Butylate                              | 279           | 1.09 (0.94, 1.27)        | 0.26    |
| Chlorimuron Ethyl                     | 258           | 0.94 (0.80, 1.09)        | 0.41    |
| Dicamba                               | 444           | 1.26 (1.06, 1.49)        | 0.01    |
| EPTC                                  | 167           | 1.09 (0.91, 1.30)        | 0.37    |
| Glyphosate                            | 625           | 1.27 (1.05, 1.52)        | 0.01    |
| Imazethapyr                           | 334           | 1.00 (0.85, 1.18)        | 0.96    |
| Metolachlor                           | 358           | 1.00 (0.86, 1.16)        | 0.98    |
| Paraquat                              | 167           | 0.93 (0.77, 1.12)        | 0.42    |
| Pendimethalin                         | 305           | 0.91 (0.78, 1.06)        | 0.21    |
| Petroleum Oil ≤ 62 years <sup>b</sup> | 204           | 0.95 (0.78, 1.16)        | 0.64    |
| > 62 years <sup>b</sup>               | 193           | 1.24 (0.99, 1.55)        | 0.06    |
| Trifluralin                           | 436           | 1.11 (0.95, 1.30)        | 0.19    |
| 2,4-D                                 | 651           | 1.31 (1.07, 1.61)        | 0.01    |
| 2,4,5-T                               | 217           | 1.05 (0.89, 1.24)        | 0.58    |
| 2,4,5-TP                              | 92            | 1.09 (0.87, 1.36)        | 0.44    |
| Atrazine ≤ 62 years <sup>b</sup>      | 306           | 0.86 (0.69, 1.08)        | 0.19    |
| > 62 years <sup>b</sup>               | 299           | 1.18 (0.91, 1.53)        | 0.22    |
| Cyanazine                             | 354           | 1.09 (0.93, 1.27)        | 0.31    |
| Metribuzin                            | 375           | 1.03 (0.88, 1.20)        | 0.69    |

Abbreviation: 2,4-D, 2,4-Dichlorophenoxyacetic acid; 2,4,5-T, 2,4,5-Trichlorophenoxyacetic acid; 2,4,5-T,P, 2-(2,4,5-trichlorophenoxy) propionic acid; CI, Confidence Intervals; DDT,

Dichlorodiphenyltrichloroethane; EPTC, S-Ethyl dipropylthiocarbamate; HR, Hazard Ratio

<sup>a</sup>Adjusted for sex, education, state, and smoking

<sup>b</sup>HR allowed to vary by the median age for pesticides that did not meet proportional hazards assumptions

Table S7: Ever-use of pesticides and hypothyroidism risk – cases restricted to those confirmed by a validation questionnaire or medical records or who reported having hypothyroidism  $\geq 2$  times in surveys (N=34,464).

| Pesticide                                         | Exposed cases | HR (95% CI) <sup>a</sup> | P-value |
|---------------------------------------------------|---------------|--------------------------|---------|
| <b>Organochlorine insecticide</b>                 |               |                          |         |
| Aldrin                                            | 76            | 1.07 (0.81, 1.42)        | 0.62    |
| Chlordane                                         | 112           | 1.36 (1.07, 1.73)        | 0.01    |
| DDT                                               | 85            | 0.97 (0.74, 1.29)        | 0.84    |
| Dieldrin                                          | 33            | 1.27 (0.88, 1.86)        | 0.21    |
| Heptachlor                                        | 65            | 1.06 (0.79, 1.43)        | 0.68    |
| Lindane $\leq 62$ years <sup>b</sup>              | 47            | 1.01 (0.73, 1.39)        | 0.97    |
| > 62 years <sup>b</sup>                           | 45            | 1.78 (1.19, 2.66)        | <0.01   |
| Toxaphene                                         | 40            | 0.81 (0.58, 1.14)        | 0.23    |
| <b>Carbamate insecticide</b>                      |               |                          |         |
| Aldicarb                                          | 20            | 0.61 (0.38, 0.98)        | 0.04    |
| Carbaryl                                          | 206           | 1.13 (0.89, 1.42)        | 0.31    |
| Carbofuran                                        | 112           | 1.25 (0.99, 1.57)        | 0.06    |
| <b>Organophosphate insecticide</b>                |               |                          |         |
| Chlorpyrifos                                      | 145           | 0.98 (0.79, 1.22)        | 0.85    |
| Coumaphos                                         | 28            | 0.88 (0.60, 1.30)        | 0.51    |
| Diazinon $\leq 62$ years <sup>b</sup>             | 92            | 1.41 (1.07, 1.87)        | 0.02    |
| > 62 years <sup>b</sup>                           | 56            | 2.17 (1.47, 3.21)        | <0.01   |
| Dichlorvos                                        | 60            | 1.50 (1.13, 2.00)        | 0.01    |
| Fonofos                                           | 90            | 1.20 (0.93, 1.55)        | 0.16    |
| Malathion                                         | 273           | 1.44 (1.1, 1.88)         | 0.01    |
| Parathion                                         | 57            | 1.25 (0.93, 1.68)        | 0.14    |
| Phorate                                           | 117           | 0.97 (0.77, 1.24)        | 0.83    |
| Terbufos                                          | 138           | 1.05 (0.83, 1.31)        | 0.70    |
| <b>Pyrethroid insecticide</b>                     |               |                          |         |
| Permethrin (animals)                              | 58            | 1.15 (0.86, 1.54)        | 0.34    |
| Permethrin (crops)                                | 56            | 1.30 (0.97, 1.74)        | 0.08    |
| <b>Fumigant</b>                                   |               |                          |         |
| Carbon tetrachloride/ Carbon disulphide 80/20 mix | 21            | 1.01 (0.65, 1.58)        | 0.96    |
| Ethylene Dibromide                                | 10            | 0.9 (0.48, 1.71)         | 0.75    |
| Methyl Bromide                                    | 49            | 1.29 (0.89, 1.87)        | 0.18    |
| <b>Fungicide</b>                                  |               |                          |         |
| Benomyl                                           | 30            | 0.96 (0.64, 1.45)        | 0.84    |
| Captan                                            | 39            | 0.93 (0.67, 1.30)        | 0.68    |
| Chlorothalonil                                    | 18            | 0.79 (0.48, 1.30)        | 0.36    |
| Maneb/Mancozeb                                    | 28            | 0.95 (0.62, 1.45)        | 0.82    |
| Metalaxyl $\leq 62$ years <sup>b</sup>            | 50            | 0.97 (0.68, 1.39)        | 0.88    |
| > 62 years <sup>b</sup>                           | 14            | 0.77 (0.42, 1.41)        | 0.39    |
| <b>Herbicide</b>                                  |               |                          |         |
| Alachlor                                          | 187           | 1.03 (0.82, 1.28)        | 0.82    |
| Butylate                                          | 112           | 0.96 (0.76, 1.21)        | 0.73    |
| Chlorimuron Ethyl $\leq 62$ years <sup>b</sup>    | 78            | 0.81 (0.61, 1.07)        | 0.14    |
| > 62 years <sup>b</sup>                           | 34            | 0.96 (0.64, 1.45)        | 0.85    |
| Dicamba                                           | 197           | 1.28 (0.99, 1.66)        | 0.06    |

| Pesticide     | Exposed cases | HR (95% CI) <sup>a</sup> | P-value |
|---------------|---------------|--------------------------|---------|
| EPTC          | 78            | 1.14 (0.87, 1.48)        | 0.34    |
| Glyphosate    | 286           | 1.44 (1.08, 1.92)        | 0.01    |
| Imazethapyr   | 156           | 1.06 (0.83, 1.35)        | 0.66    |
| Metolachlor   | 156           | 0.97 (0.77, 1.21)        | 0.78    |
| Paraquat      | 68            | 0.93 (0.70, 1.24)        | 0.63    |
| Pendimethalin | 139           | 0.95 (0.76, 1.19)        | 0.68    |
| Petroleum Oil | 179           | 1.20 (0.96, 1.49)        | 0.12    |
| Trifluralin   | 197           | 1.18 (0.93, 1.49)        | 0.18    |
| 2,4-D         | 286           | 1.55 (1.14, 2.12)        | 0.01    |
| 2,4,5-T       | 91            | 1.25 (0.97, 1.61)        | 0.09    |
| 2,4,5-TP      | 42            | 1.31 (0.94, 1.82)        | 0.11    |
| Atrazine      | 260           | 1.21 (0.92, 1.58)        | 0.17    |
| Cyanazine     | 153           | 1.06 (0.83, 1.34)        | 0.66    |
| Metribuzin    | 164           | 1.01 (0.80, 1.27)        | 0.94    |

Abbreviation: 2,4-D, 2,4-Dichlorophenoxyacetic acid; 2,4,5-T, 2,4,5-Trichlorophenoxyacetic acid; 2,4,5-T,P, 2-(2,4,5-trichlorophenoxy) propionic acid; CI, Confidence Intervals; DDT, Dichlorodiphenyltrichloroethane; EPTC, S-Ethyl dipropylthiocarbamate; HR, Hazard Ratio

<sup>a</sup>Adjusted for sex, education, state, and smoking

<sup>b</sup>HR allowed to vary by the median age for pesticides that did not meet proportional hazards assumptions

Table S8: Ever-use of pesticide and hypothyroidism risk using inverse probability of censoring weights.

| Pesticide                                           | Exposed cases | HR (95% CI) <sup>a</sup> | p-value |
|-----------------------------------------------------|---------------|--------------------------|---------|
| Organochlorine insecticide                          |               |                          |         |
| Aldrin ≤ 62 years <sup>b</sup>                      | 60            | 0.89 (0.67, 1.18)        | 0.42    |
| > 62 years <sup>b</sup>                             | 156           | 1.29 (1.03, 1.62)        | 0.03    |
| Chlordane                                           | 276           | 1.20 (1.02, 1.40)        | 0.02    |
| DDT ≤ 62 years <sup>b</sup>                         | 66            | 0.84 (0.64, 1.12)        | 0.24    |
| > 62 years <sup>b</sup>                             | 199           | 1.22 (0.97, 1.52)        | 0.08    |
| Dieldrin ≤ 62 years <sup>b</sup>                    | 20            | 0.94 (0.60, 1.48)        | 0.78    |
| > 62 years <sup>b</sup>                             | 68            | 1.25 (0.96, 1.64)        | 0.10    |
| Heptachlor ≤ 62 years <sup>b</sup>                  | 47            | 0.82 (0.60, 1.12)        | 0.22    |
| > 62 years <sup>b</sup>                             | 136           | 1.34 (1.05, 1.70)        | 0.02    |
| Lindane ≤ 62 years <sup>b</sup>                     | 94            | 1.00 (0.79, 1.26)        | 1.00    |
| > 62 years <sup>b</sup>                             | 116           | 1.59 (1.26, 2.01)        | <.0001  |
| Toxaphene                                           | 128           | 1.00 (0.82, 1.22)        | 0.96    |
| Carbamate insecticide                               |               |                          |         |
| Aldicarb                                            | 62            | 0.79 (0.59, 1.05)        | 0.11    |
| Carbaryl                                            | 496           | 1.12 (0.96, 1.31)        | 0.15    |
| Carbofuran                                          | 261           | 1.13 (0.97, 1.32)        | 0.12    |
| Organophosphate insecticide                         |               |                          |         |
| Chlorpyrifos                                        | 350           | 1.02 (0.89, 1.18)        | 0.77    |
| Coumaphos ≤ 62 years <sup>b</sup>                   | 37            | 0.93 (0.66, 1.31)        | 0.68    |
| > 62 years <sup>b</sup>                             | 47            | 1.44 (1.05, 1.97)        | 0.02    |
| Diazinon                                            | 313           | 1.27 (1.09, 1.48)        | 0.00    |
| Dichlorvos                                          | 131           | 1.39 (1.15, 1.69)        | 0.00    |
| Fonofos                                             | 203           | 1.14 (0.96, 1.35)        | 0.14    |
| Malathion                                           | 621           | 1.23 (1.04, 1.46)        | 0.02    |
| Parathion                                           | 142           | 1.21 (1.00, 1.46)        | 0.05    |
| Phorate                                             | 285           | 0.99 (0.85, 1.15)        | 0.86    |
| Terbufos                                            | 334           | 1.14 (0.98, 1.32)        | 0.10    |
| Pyrethroid insecticide                              |               |                          |         |
| Permethrin (animals)                                | 125           | 1.17 (0.96, 1.43)        | 0.12    |
| Permethrin (crops)                                  | 114           | 1.14 (0.93, 1.40)        | 0.20    |
| Fumigant                                            |               |                          |         |
| Carbon tetrachloride/<br>Carbon disulfide 80/20 mix | 57            | 1.02 (0.77, 1.35)        | 0.90    |
| Aluminum Phosphide                                  | 41            | 1.05 (0.76, 1.45)        | 0.76    |
| Ethylene Dibromide                                  | 24            | 0.80 (0.53, 1.21)        | 0.29    |
| Methyl Bromide                                      | 113           | 0.99 (0.77, 1.26)        | 0.91    |
| Fungicide                                           |               |                          |         |
| Benomyl                                             | 74            | 0.93 (0.71, 1.21)        | 0.58    |

| Pesticide                            | Exposed cases | HR (95% CI) <sup>a</sup> | p-value |
|--------------------------------------|---------------|--------------------------|---------|
| Captan                               | 87            | 0.91 (0.73, 1.14)        | 0.42    |
| Chlorothalonil                       | 50            | 0.87 (0.64, 1.18)        | 0.37    |
| Maneb/Mancozeb                       | 73            | 0.93 (0.71, 1.22)        | 0.60    |
| Metalaxyl                            | 157           | 0.92 (0.75, 1.12)        | 0.40    |
| Herbicide                            |               |                          |         |
| Alachlor                             | 442           | 1.04 (0.90, 1.21)        | 0.60    |
| Butylate                             | 281           | 1.09 (0.93, 1.27)        | 0.29    |
| Chlorimuron Ethyl                    | 259           | 0.94 (0.80, 1.10)        | 0.44    |
| Dicamba                              | 453           | 1.28 (1.08, 1.51)        | 0.01    |
| EPTC                                 | 163           | 1.03 (0.86, 1.23)        | 0.74    |
| Glyphosate                           | 650           | 1.19 (0.99, 1.43)        | 0.07    |
| Imazethapyr                          | 335           | 0.97 (0.82, 1.13)        | 0.68    |
| Metolachlor                          | 360           | 0.97 (0.84, 1.12)        | 0.70    |
| Paraquat                             | 169           | 0.94 (0.78, 1.13)        | 0.52    |
| Pendimethalin                        | 311           | 0.91 (0.78, 1.05)        | 0.20    |
| Petroleum Oil ≤62 years <sup>b</sup> | 209           | 0.89 (0.74, 1.08)        | 0.25    |
| >62 years <sup>b</sup>               | 175           | 1.20 (0.96, 1.51)        | 0.11    |
| Trifluralin                          | 444           | 1.11 (0.95, 1.30)        | 0.18    |
| 2,4-D                                | 666           | 1.34 (1.10, 1.63)        | 0.00    |
| 2,4,5-T                              | 221           | 1.09 (0.92, 1.28)        | 0.33    |
| 2,4,5-TP                             | 96            | 1.14 (0.92, 1.42)        | 0.24    |
| Atrazine                             | 592           | 0.98 (0.83, 1.16)        | 0.81    |
| Cyanazine                            | 356           | 1.05 (0.90, 1.23)        | 0.52    |
| Metribuzin                           | 375           | 1.02 (0.88, 1.19)        | 0.79    |

Abbreviation: 2,4-D, 2,4-Dichlorophenoxyacetic acid; 2,4,5-T, 2,4,5-Trichlorophenoxyacetic acid; 2,4,5-T,P, 2-(2,4,5-trichlorophenoxy) propionic acid; CI, Confidence Intervals; DDT, Dichlorodiphenyltrichloroethane; HR, Hazard Ratio

<sup>a</sup>Adjusted for sex, education, state, and smoking

<sup>b</sup>HR allowed to vary by the median age for pesticides for which proportional hazards assumptions were not met

Note: exposed cases may differ from the main analysis because, for 25 participants, thyroid disease reports (in Phase 4) by proxy of deceased were also used to confirm hypothyroidism diagnosis in the main analysis (which were censored here assuming loss to follow up changing definition of hypothyroidism for some) and because of rounding of imputed age to create person-year data.
