# Supplementary material
Source: PubMed Central journal article supplement (PMC6375417)
Supplement: ehp3194.smcontents.508.pdf [file ehp3194.smcontents.508.pdf]

**Note to readers with disabilities:** *EHP* strives to ensure that all journal content is accessible to all readers. However, some figures and Supplemental Material published in *EHP* articles may not conform to [508 standards](#) due to the complexity of the information being presented. If you need assistance accessing journal content, please contact [ehp508@niehs.nih.gov](mailto:ehp508@niehs.nih.gov). Our staff will work with you to assess and meet your accessibility needs within 3 working days.

### **Supplemental Material**

#### **Pesticide Use and Incident Hypothyroidism in Pesticide Applicators in the Agricultural Health Study**

Srishti Shrestha, Christine G. Parks, Whitney S. Goldner, Freya Kamel, David M. Umbach, Mary H. Ward, Catherine C. Lerro, Stella Koutros, Jonathan N. Hofmann, Laura E. Beane Freeman, and Dale P. Sandler

#### **Table of Contents**

**Figure S1.** Selection of the participants for the study.

**Table S1.** Thyroid disease information collected in the Agricultural Health Study.

**Table S2.** Decision criteria for hyperthyroidism and hypothyroidism (N=1,546).

**Table S3.** Ever-use of pesticide and hypothyroidism risk adjusting for correlated pesticides.

**Table S4.** Intensity-weighted lifetime days of pesticide use and hypothyroidism risk adjusting for correlated pesticides.

**Table S5.** Ever-use of pesticides and hypothyroidism – cases restricted to those taking thyroid-related medications (N=35,073).

**Table S6.** Ever-use of pesticides and hypothyroidism risk excluding female applicators (N=34,375).

**Table S7.** Ever-use of pesticides and hypothyroidism risk – cases restricted to those confirmed by a validation questionnaire or medical records or who reported having hypothyroidism  $\geq 2$  times in surveys (N=34,464).

**Table S8.** Ever-use of pesticide and hypothyroidism risk using inverse probability of censoring weights.
